# Supplementary material for: Impact of Left Atrial Appendage Morphology on Recurrence in Embolic Stroke of Undetermined Source and Atrial Cardiopathy
Source: Frontiers journal article supplement (doi:10.3389/fneur.2021.679320), 2021-06-22
Supplement: Data_Sheet_1.pdf [file Data_Sheet_1.pdf]

Supplementary Table 1. Multivariable Cox proportional hazards regression analysis investigating the association between variables and outcomes (model 1).

| Variables            | Embolic stroke<br>recurrence<br>aHR (95% CI) | Ischemic stroke<br>recurrence<br>aHR (95% CI) | Any stroke<br>recurrence<br>aHR (95% CI) | Mortality<br>aHR (95% CI) |
|----------------------|----------------------------------------------|-----------------------------------------------|------------------------------------------|---------------------------|
| LAA                  | 3.10                                         | 2.39                                          | 1.85                                     | 1.57                      |
| morphology           | (1.10–8.73)                                  | (0.96–5.95)                                   | (0.80–4.29)                              | (0.50–4.92)               |
| Age                  | 1.07<br>(1.01–1.13)                          | 1.06<br>(1.003–1.11)                          | 1.06<br>(1.01–1.12)                      | 1.03<br>(0.97–1.10)       |
| Males                | 0.84<br>(0.31–2.26)                          | 1.05<br>(0.42–2.64)                           | 1.10<br>(0.45–2.66)                      | 1.07<br>(0.33–3.47)       |
| Baseline NIHSS score | 1.03<br>(0.95–1.12)                          | 1.03<br>(0.95–1.11)                           | 1.02<br>(0.94–1.10)                      | 1.18<br>(1.10–1.26)       |

Outcomes are presented as the hazard ratio (95% confidence interval) for values of non-chicken wing compared to chicken wing left atrial appendage morphology.

aHR, adjusted hazard ratio; LAA, left atrial appendage; NIHSS, National Institute of Health Stroke Scale

Supplementary Table 2. Multivariable Cox proportional hazards regression analysis investigating the association between variables and outcomes (model 2).

| Variables                          | Embolic stroke<br>recurrence | Ischemic stroke<br>recurrence | Any stroke<br>recurrence | Mortality    |
|------------------------------------|------------------------------|-------------------------------|--------------------------|--------------|
|                                    | aHR (95% CI)                 | aHR (95% CI)                  | aHR (95% CI)             | aHR (95% CI) |
| LAA                                | 2.90                         | 2.33                          | 1.60                     | 1.66         |
| morphology                         | (1.02–8.23)                  | (0.93–5.84)                   | (0.70–3.64)              | (0.54–5.11)  |
| CHA <sub>2</sub> DS <sub>2</sub> - | 1.37                         | 1.37                          | 1.36                     | 1.15         |
| VASc score                         | (0.99–1.91)                  | (1.003–1.86)                  | (1.02–1.81)              | (0.80–1.64)  |
| Number of PES                      |                              |                               |                          |              |
| 0                                  | Ref                          | Ref                           | Ref                      | Ref          |
| 1                                  | 3.28                         | 3.62                          | 1.85                     | 1.55         |
|                                    | (0.42–25.55)                 | (0.47–27.86)                  | (0.42–8.20)              | (0.18–13.24) |
| ≥2                                 | 2.26                         | 2.45                          | 1.36                     | 3.10         |
|                                    | (0.24–21.16)                 | (0.27–22.13)                  | (0.26–7.19)              | (0.35–27.50) |

Outcomes are presented as the hazard ratio (95% confidence interval) for values of non-chicken wing compared to chicken wing left atrial appendage morphology.

aHR, adjusted hazard ratio; LAA, left atrial appendage; PES, potential embolic source

Supplementary Table 3. Multivariable Cox proportional hazards regression analysis investigating the association between variables and outcomes (model 3).

| Variables                                              | Embolic stroke<br>recurrence<br>aHR (95% CI) | Ischemic stroke<br>recurrence<br>aHR (95% CI) | Any stroke<br>recurrence<br>aHR (95% CI) | Mortality<br>aHR (95% CI) |
|--------------------------------------------------------|----------------------------------------------|-----------------------------------------------|------------------------------------------|---------------------------|
| LAA                                                    | 2.95                                         | 2.31                                          | 1.58                                     | 1.44                      |
| morphology                                             | (1.03–8.43)                                  | (0.91–5.83)                                   | (0.69–3.63)                              | (0.44–4.71)               |
| Hypertension                                           | 1.41                                         | 1.35                                          | 1.31                                     | 1.02                      |
|                                                        | (0.48–4.10)                                  | (0.50–3.66)                                   | (0.52–3.33)                              | (0.29–3.63)               |
| Diabetes                                               | 0.91                                         | 1.46                                          | 1.55                                     | 1.43                      |
| mellitus                                               | (0.29–2.89)                                  | (0.54–3.95)                                   | (0.61–3.93)                              | (0.39–5.25)               |
| Hyperlipidemia                                         | 1.25                                         | 1.30                                          | 1.24                                     | 0.93                      |
|                                                        | (0.47–3.32)                                  | (0.52–3.23)                                   | (0.53–2.92)                              | (0.29–2.95)               |
| Supraventricular<br>r tachycardia or<br>subclinical AF | 1.44                                         | 1.19                                          | 1.00                                     | 2.76                      |
|                                                        | (0.51–4.05)                                  | (0.44–3.22)                                   | (0.38–2.64)                              | (0.89–8.62)               |

Outcomes are presented as the hazard ratio (95% confidence interval) for values of non-chicken wing compared to chicken wing left atrial appendage morphology.

aHR, adjusted hazard ratio; LAA, left atrial appendage; AF, atrial fibrillation
